# Supplementary material for: Energy-Saving LED Light Affects the Efficiency of the Photosynthetic Apparatus and Carbohydrate Content in Gerbera jamesonii Bolus ex Hook. f. Axillary Shoots Multiplied In Vitro
Source: MDPI journal article supplement (doi:10.3390/biology10101035), 2021-10-12
Supplement: s1 [file s1]

**Table S1.** Mean content of free sugars in the tissues of gerbera multiplied *in vitro* under light of different qualities (µg/mg).

| Light quality  | Monosaccharides<br>and sugar alcohol derivatives | Oligosaccharides | Σ               |
|----------------|--------------------------------------------------|------------------|-----------------|
| B <sup>1</sup> | 22.26 ± 2.04 a <sup>2</sup>                      | 7.56 ± 1.63 a    | 29.82 ± 2.14 a  |
| RB             | 28.04 ± 4.19 ab                                  | 8.41 ± 2.01 ab   | 36.45 ± 5.63 ab |
| R              | 29.40 ± 6.19 ab                                  | 12.29 ± 0.74 b   | 41.68 ± 6.87 ab |
| Fl             | 38.54 ± 11.72 b                                  | 10.83 ± 3.36 ab  | 49.38 ± 14.74 b |

<sup>1</sup> B—100% blue LED (430 nm); RB—a mixture of red (70%) and blue (30%) LED; R—100% red LED (670 nm); Fl—control, fluorescence Philips TL-D 36W/54 lamps. <sup>2</sup> Means ± standard deviations within a column followed by the same letter are not significantly different according to Duncan's multiple range test at  $p \leq 0.05$ .
