# Supplementary material for: Energy-Saving LED Light Affects the Efficiency of the Photosynthetic Apparatus and Carbohydrate Content in Gerbera jamesonii Bolus ex Hook. f. Axillary Shoots Multiplied In Vitro
Source: MDPI journal article supplement (doi:10.3390/biology10101035), 2021-10-12
Supplement: s1 [file s1]

**Table S2.** The content of individual identified free sugars in the tissues of gerbera multiplied *in vitro* under light of different qualities (µg/mg).

| Light quality  | Sugar alcohol derivatives  |               | Monosaccharides |                | Oligosaccharides |               |                |               |                |                  |
|----------------|----------------------------|---------------|-----------------|----------------|------------------|---------------|----------------|---------------|----------------|------------------|
|                | Inositol                   | Glycerol      | Glucose         | Fructose       | Maltose          | Sucrose       | Raffinose      | Stachyose     | 1-kestose      | 1.1-tetrakestose |
| B <sup>1</sup> | 1.53 ± 0.13 a <sup>2</sup> | 1.70 ± 0.20 b | 10.25 ± 1.21 a  | 8.78 ± 1.09 a  | 2.49 ± 0.28 b    | 1.18 ± 1.07 a | 1.01 ± 0.21 ab | 0.33 ± 0.08 a | 1.42 ± 0.13 a  | 1.13 ± 0.20 b    |
| RB             | 2.84 ± 0.38 b              | 1.11 ± 0.25 a | 16.26 ± 3.82 ab | 7.84 ± 0.49 a  | 1.98 ± 0.20 a    | 2.16 ± 1.47 a | 0.79 ± 0.10 a  | 0.64 ± 0.13 a | 1.60 ± 0.30 ab | 1.23 ± 0.06 b    |
| R              | 3.24 ± 0.36 bc             | 1.01 ± 0.22 a | 16.31 ± 2.87 ab | 8.83 ± 2.83 a  | 2.48 ± 0.06 b    | 4.12 ± 0.94 a | 4.46 ± 0.06 b  | 1.02 ± 0.25 b | 2.45 ± 0.15 c  | 0.94 ± 0.20 ab   |
| Fl             | 3.58 ± 0.24 c              | 1.28 ± 0.19 a | 22.27 ± 6.24 b  | 11.42 ± 5.40 a | 2.26 ± 0.17 ab   | 4.46 ± 3.22 a | 0.71 ± 0.30 a  | 0.66 ± 0.16 a | 2.07 ± 0.47 bc | 0.67 ± 0.17 a    |

<sup>1</sup> B—100% blue LED (430 nm); RB—a mixture of red (70%) and blue (30%) LED; R—100% red LED (670 nm); Fl—control, fluorescence Philips TK-D 36W/54 lamps. <sup>2</sup> Means ± standard deviations within a column followed by the same letter are not significantly different according to Duncan's multiple range test at  $p \leq 0.05$ .
