# Supplementary material for: Energy-Saving LED Light Affects the Efficiency of the Photosynthetic Apparatus and Carbohydrate Content in Gerbera jamesonii Bolus ex Hook. f. Axillary Shoots Multiplied In Vitro
Source: MDPI journal article supplement (doi:10.3390/biology10101035), 2021-10-12
Supplement: s1 [file s1]

**Table S4.** Content of starch in gerbera axillary shoots multiplied *in vitro* under different light qualities (µg/mg).

| Light quality  | Starch                     |
|----------------|----------------------------|
| B <sup>1</sup> | 0.69 ± 0.06 a <sup>2</sup> |
| RB             | 0.68 ± 0.26 a              |
| R              | 0.73 ± 0.11 a              |
| Fl             | 0.78 ± 0.34 a              |

<sup>1</sup> B - 100% blue LED light (430 nm); RB—a mixture of red (70%) and blue (30%) LED light; R - 100% red LED light (670 nm); Fl - control, fluorescence Philips TK-D 36W/54 lamps. <sup>2</sup> Means ± standard deviations within a column followed by the same letter are not significantly different according to Duncan's multiple range test at  $p \leq 0.05$
