# Supplementary material for: Energy-Saving LED Light Affects the Efficiency of the Photosynthetic Apparatus and Carbohydrate Content in Gerbera jamesonii Bolus ex Hook. f. Axillary Shoots Multiplied In Vitro
Source: MDPI journal article supplement (doi:10.3390/biology10101035), 2021-10-12
Supplement: s1 [file s1]

**Table S3.** Degree of polymerization (DP) of soluble oligosaccharides in gerbera axillary shoots multiplied *in vitro* under different light qualities.

| Light quality  | DP                         |
|----------------|----------------------------|
| B <sup>1</sup> | 4.01 ± 0.64 a <sup>2</sup> |
| RB             | 4.20 ± 0.08 a              |
| R              | 4.71 ± 1.45 a              |
| Fl             | 3.92 ± 0.55 a              |

<sup>1</sup> B—100% blue LED (430 nm); RB—a mixture of red (70%) and blue (30%) LED; R—100% red LED (670 nm); Fl—control, fluorescence Philips TK-D 36W/54 lamps. <sup>2</sup> Means ± standard deviations within a column followed by the same letter are not significantly different according to Duncan's multiple range test at  $p \leq 0.05$ .
