# Supplementary material for: Energy-Saving LED Light Affects the Efficiency of the Photosynthetic Apparatus and Carbohydrate Content in Gerbera jamesonii Bolus ex Hook. f. Axillary Shoots Multiplied In Vitro
Source: Biology (Basel). 2021 Oct 12;10(10):1035. doi: 10.3390/biology10101035 (PMC8533489; doi:10.3390/biology10101035)
Supplement: Supplementary file 1 [file biology-10-01035-s001.zip]

Archive with 4 entries (4 files):
- Table S1_v2.pdf
- Table S2_v2.pdf
- Table S3_v2.pdf
- Table S4_v2.pdf
